# Supplementary material for: Diseases of Cannabis sativa Caused by Diverse Fusarium Species
Source: Frontiers journal article supplement (doi:10.3389/fagro.2021.796062), 2022-01-18
Supplement: Table_5.DOCX [file Table_5.DOCX]

Table 5. Diseases reported in *C. sativa* caused by members of the *Fusarium sambucinum* Species Complex.

| **Species** | **Initial isolation** | **Symptoms*** | | **Molecular markers** | **Pathogenicity Assays** | **Source** |
| --- | --- | --- | --- | --- | --- | --- |
| ***Controlled environments (includes greenhouse, hydroponic, and indoor facilities)*** | | | | | | |
| *F. graminearum* | Flower buds, preharvest | | Mycelium - prolific whitish-pink, causes wilt in pathogenicity assay. | EF-1α/ EF1 and EF2a; ITS1-5.8S-ITS2/ UN-UP18 S42 and UN-LO28 S576Bb | Yes, flower buds | Punja and Ni, 2021 |
| **Unspecified or multiple** | | | | | | |
| *F. graminearum* | Flowers and leaves of plants | | Foliar and flower blight, circular, light-brown necrotic lesions, tips of flowers necrotic, mycelium apparent | EF-1α/ EF-1 and EF-2a; RPB2/ bRPB2-6F and bRPB2-7Rc;β-tubulin/ T1 and T22d | Yes | Thieseen et al., 2020 |
| **Field** | | | | | | |
| *F. graminearum* | Flower buds, preharvest | | Bud rot, necrosis, mycelium apparent | EF-1α/ EF1 and EF2a | Yes, flowers of greenhouse-grown plants | Yulfo-Soto et al., 2021 |
| *F. graminearum* | Flower buds, preharvest | | Wilt, co-occurrence with *F. tricinctum and F. avenaceum* | EF-1α/ EF1 and EF2a; ITS1-5.8S-ITS2/ UN-UP18 S42 and UN-LO28 S576Bb | Yes, rooted cuttings | Punja and Ni, 2021 |
| *F. brachygibbosum* | Foliage and crown | | Yellowing of foliage and sunken lesions in crown. Co-isolated with *F. oxysporum* | EF-1α/ EF1 and EF2a; ITS1-5.8S-ITS2/ UN-UP18 S42 and UN-LO28 S576Bb | Not specified | Punja et al., 2019 |
| *F. brachygibbosum* | Crown outer bark, cortical and vascular tissues | | Yellowing and wilting followed by total plant collapse in hot weather. Crown regions - dark and sunken with internal tissue discoloration. Root mass reduction. | EF-1α/ EF1 and EF2a; ITS1-5.8S-ITS2/ UN-UP18 S42 and UN-LO28 S576Bb | Yes, rooted cuttings | Punja et al. 2018 |

Molecular regions: EF-1α = Translation elongation factor 1-α; ITS1-5.8S-ITS2 = Internal transcribed spacer region of ribosomal DNA; RPB2 = subunit of RNA polymerase II.

aO’Donnell et al., 1998; bSchroeder et al., 2006; cMatheny, 2005; dO’Donnell and Cigelnik, 1997.
